# Supplementary material for: Highly Porous SnO2/TiO2 Heterojunction Thin-Film Photocatalyst Using Gas-Flow Thermal Evaporation and Atomic Layer Deposition
Source: MDPI journal article supplement (doi:10.3390/catal11101144), 2021-09-23
Supplement: s1 [file s1]

# **Highly Porous SnO<sub>2</sub>/TiO<sub>2</sub> Heterojunction Thin-Film Photocatalyst Using Gas-Flow Thermal Evaporation and Atomic Layer Deposition**

Sungjin Kim<sup>1,2</sup>, Hyeon-Kyung Chang<sup>1,2</sup>, Kwang Bok Kim<sup>3</sup>, Hyun-Jong Kim<sup>1</sup>, Ho-Nyun Lee<sup>1</sup>, Tae Joo Park<sup>2</sup>, Young Min Park<sup>1,\*</sup>

<sup>1</sup>*Heat and Surface Technology R&D Department, Korea Institute of Industrial Technology (KITECH), Incheon 21999, Korea*

<sup>2</sup>*Department of Materials Science and Chemical Engineering, Hanyang University, Ansan 15588, Korea*

<sup>3</sup>*Digital Health Care R&D Department, Korea Institute of Industrial Technology (KITECH), Cheonan 31056, Korea*

\*Corresponding author.

Tel.: +82-10-4728-7958, fax: +82-32-850-0240; e-mail: youngmin@kitech.re.kr

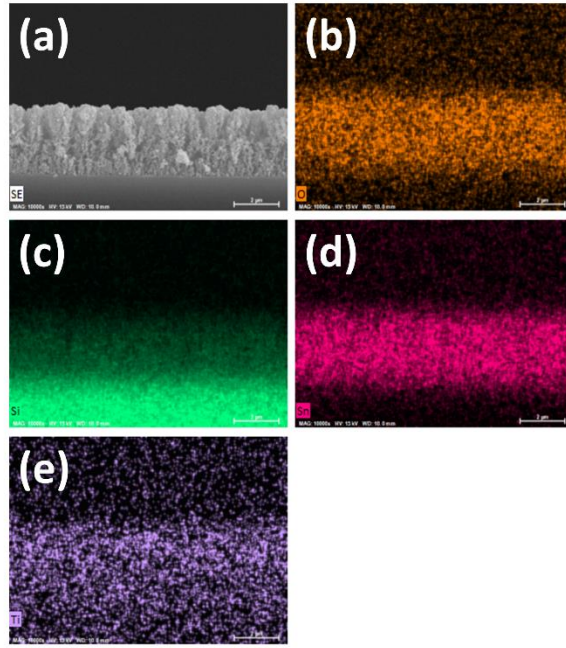

**Figure S1.** EDX mapping for SnO<sub>2</sub>/TiO<sub>2</sub>-50: (a) lateral SEM image of SnO<sub>2</sub>/TiO<sub>2</sub>-50 of information collection area, (b) O element, (c) Si element (d) Sn element and (e) Ti element.

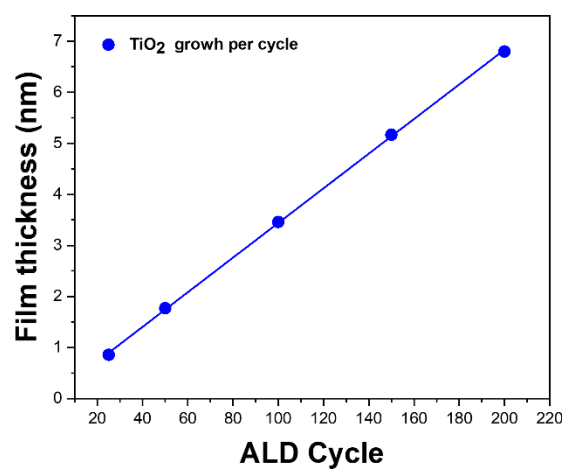

**Figure S2.** Growth per cycle (GPC) of TiO<sub>2</sub> thin film at 300°C on Si substrate

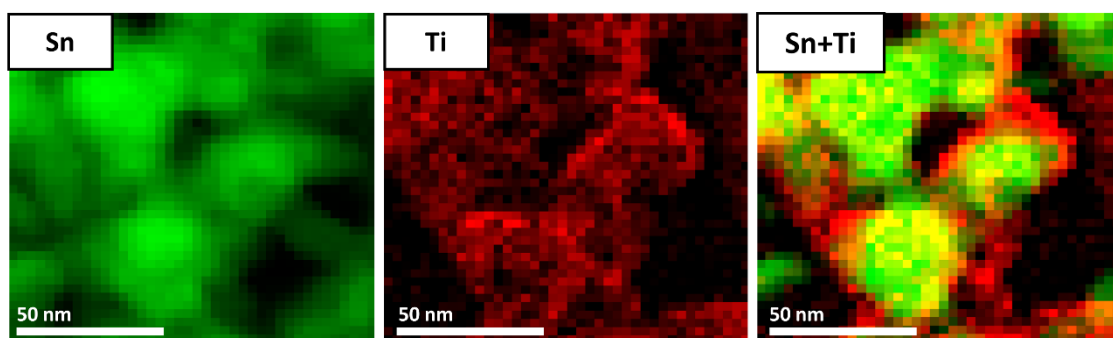

**Figure S3.** EELS spectrum of  $\text{SnO}_2/\text{TiO}_2$ -50. Sn and Ti clearly reveals presence as heterojunction structure.

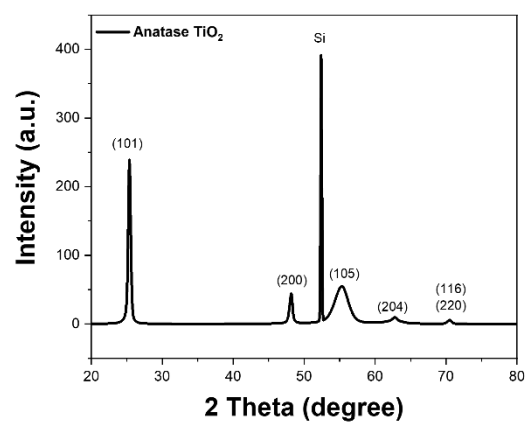

**Figure S4.** XRD pattern of as-deposited TiO<sub>2</sub> layer by ALD cycles process on Si substrate

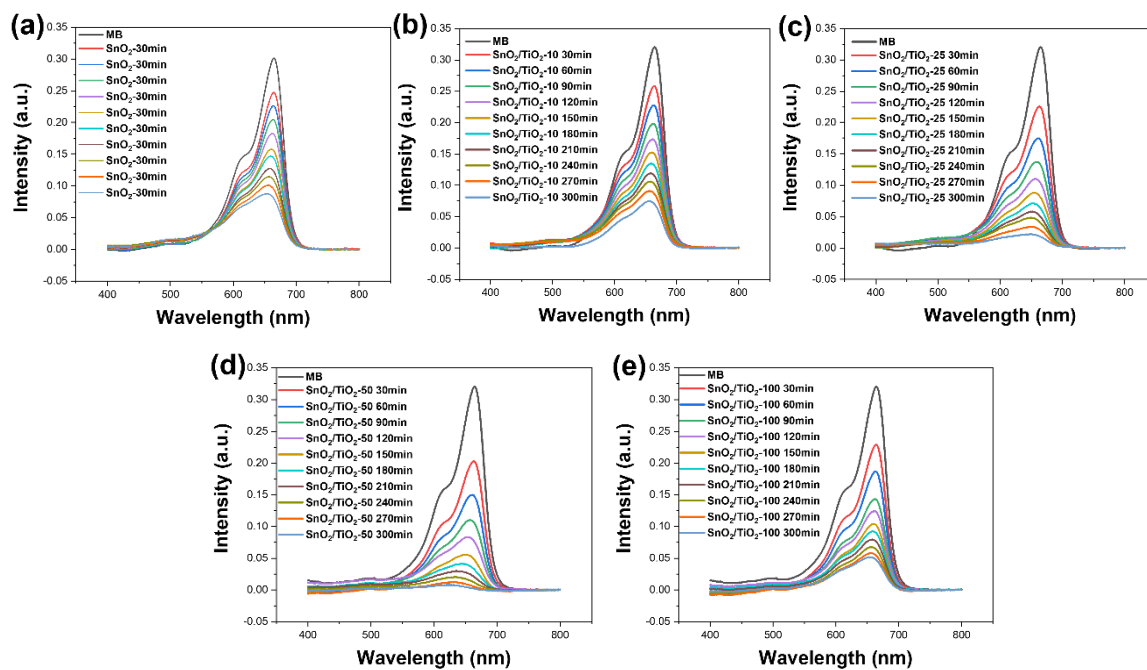

**Figure S5.** UV-Visible absorbance spectra of photodegradation of methylene blue (a)-(e) by  $\text{SnO}_2$  and all  $\text{SnO}_2/\text{TiO}_2$  with different ALD cycles.

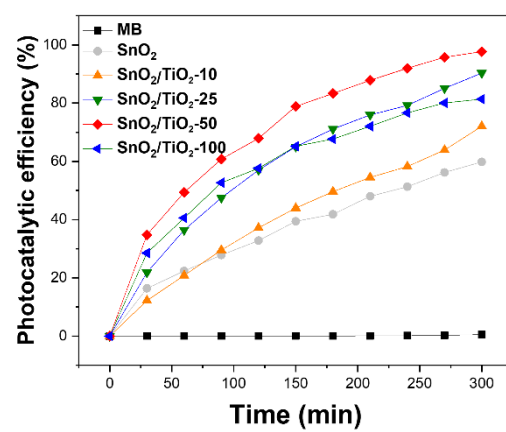

**Figure S6.** The photocatalytic efficiency (%) with increasing degradation time by SnO<sub>2</sub> and all SnO<sub>2</sub>/TiO<sub>2</sub>-50 photocatalysts.
